Original Article

## Type 1 diabetes mellitus and risk of cancer: a meta-analysis of observational studies

Mukete Franklin Sona<sup>1,2</sup>, Seung-Kwon Myung<sup>3,4,5,\*</sup>, Keeho Park<sup>1</sup>, and Galsuren Jargalsaikhan<sup>1,6</sup>

<sup>1</sup>Department of Cancer Control and Population Health, National Cancer Center Graduate School of Cancer Science and Policy, Goyang, Korea, <sup>2</sup>Regional Hospital Garoua, Ministry of Public Health, Garoua, Republic of Cameroon, <sup>3</sup>Department of Cancer Biomedical Science, National Cancer Center Graduate School of Cancer Science and Policy, <sup>4</sup>Cancer Epidemiology Branch, Division of Cancer Epidemiology and Prevention, Research Institute, National Cancer Center, <sup>5</sup>Department of Family Medicine and Center for Cancer Prevention and Detection, Hospital, National Cancer Center, Goyang, Korea, and <sup>6</sup>School of Public Health, Mongolian National University of Medical Sciences, Ulaanbaatar, Mongolia

\*For reprints and all correspondence: Seung-Kwon Myung, Department of Cancer Biomedical Science, National Cancer Center Graduate School of Cancer Science and Policy, 323 Ilsan-ro, Ilsandong-gu, Goyang, Gyeonggi-do 10408, Korea; Cancer Epidemiology Branch, Division of Cancer Epidemiology and Prevention, Research Institute, National Cancer Center, Goyang, Korea; Department of Family Medicine and Center for Cancer Prevention and Detection, Hospital, National Cancer Center, Goyang, Korea. E-mail: msk@ncc.re.kr

Received 9 November 2017; Editorial Decision 21 March 2018; Accepted 3 April 2018

### Abstract

**Objective:** Previous observational studies have focused on the link between type 2 diabetes and the risk of cancer. However, the association between type 1 diabetes and the risk of cancer has not been well addressed. This study aimed to investigate the association between type 1 diabetes and the risk of cancer by using a meta-analysis of observational studies.

**Methods:** We searched PubMed and EMBASE for observational studies that examined the association between type 1 diabetes and cancer in April 2017. We calculated the pooled odds ratios (ORs) or relative risks (RRs) with confidence intervals (CIs) from individual studies based on a random-effects model meta-analysis.

**Results:** We included a total of 15 observational studies with two case–control studies and 13 cohort studies involving 31 893 cancer patients among a total of 1 915 179 participants in the final analysis. In the random-effects meta-analysis of all studies, patients with type 1 diabetes had an increased risk of cancer (OR or RR, 1.29; 95% CI, 1.09–1.52;  $n = 15$ ;  $I^2 = 95.2\%$ ). In the subgroup meta-analysis by type of cancer, type 1 diabetes significantly increased the risk of cancers of stomach, lung, pancreas, liver, ovary and kidney, whereas it significantly decreased the risk of breast cancer (OR or RR, 0.91; 95% CI, 0.86–0.95;  $n = 9$ ;  $I^2 = 0\%$ ).

**Conclusion:** This meta-analysis suggests that type 1 diabetes is associated with the increased risk of several types of cancer and the decreased risk of breast cancer. However, the plausible mechanisms for the decreased risk of breast cancer remain unclear. Further prospective studies with proper adjustment for possible confounding factors are warranted.

**Key words:** type 1 diabetes, cancer, observational study, cohort study, meta-analysis

## Introduction

It has been reported that patients with diabetes mellitus have an excess risk of cancer by 20–25% compared to those without diabetes (1). Specifically, there is increasing epidemiological evidence that type 2 diabetes mellitus is associated with an increased risk of certain site-specific cancers, such as breast cancer, colorectal cancer, liver cancer and pancreatic cancer (2). However, the association between type 1 diabetes and cancer remains unclear because relatively a small number of studies have investigated the risk of cancer in patients with type 1 diabetes, and the findings on the association between type 2 diabetes and the risk of cancer could not be directly applied to type 1 diabetes because patients with type 2 diabetes are usually older and more obese than those with type 1 diabetes (3). Although hyperglycemia is common to these two types of diabetes mellitus (DM), insulin resistance and hyperinsulinemia are more noticeable in type 2 diabetes than type 1 diabetes, and type 2 diabetes is less exposed to exogenously administered insulin administration than type 1 diabetes (4). Plausible mechanisms for the increased risk of cancer in patients with type 2 diabetes are hyperglycemia, hyperinsulinemia and insulin resistance (5).

Previous observational epidemiological studies such as case-control studies and cohort studies have reported inconsistent findings on the association between type 1 diabetes and the risk of cancer (3, 4, 6–14). Some studies (3, 4, 6, 7, 10, 13, 14) concluded that type 1 diabetes was associated with an increased risk of cancer, whereas others (8, 9, 11, 12) indicated that there was no significant association between them. Iatrogenic insulin excess itself, possible mutagenic effects of insulin or insulin analog, and insulin-like growth factor-1 (IGF-1) due to excess insulin might be the potential biological plausibility for the increase risks of certain cancers (15–17). However, there is no published meta-analysis on this topic until now.

This study aimed to investigate the association between type 1 diabetes and the risk of cancer by using a meta-analysis of observational epidemiological studies according to various factors such as type of cancer, study design, study region, sample size, gender and methodological quality of study.

## Methods

### Literature search

Studies were identified by searching PubMed and EMBASE in April 2017, using keywords related to the association between type 1 diabetes and the risk of cancer. The followings were keywords for literature search: ‘type 1 diabetes’ and ‘cancer’. We also reviewed the list of references from the identified publications in order to locate studies that might not be found during the search. There was no restriction on the language of publication.

### Selection criteria

We included observational studies such as case-control studies and prospective or retrospective cohort studies that investigated the association between type 1 diabetes and the risk of cancer, reporting measures of outcomes with adjusted odds ratios (ORs) or relative risks (RRs) and 95% confidence intervals (CIs). For data that were identical in more than one study or duplicated, the more comprehensive or first published study was included in the analysis.

### Selection of relevant studies

Two of the authors (M.F.S., G.J.) independently evaluated the eligibility of all studies extracted from the databases based on the pre-determined

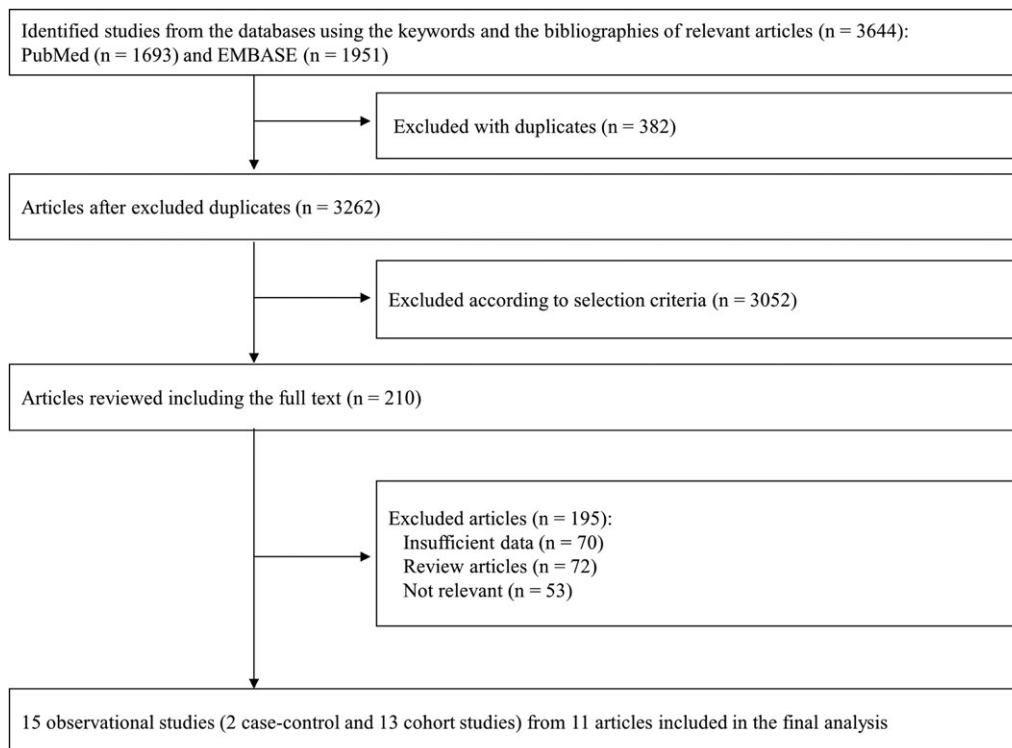

**Figure 1.** Flow diagram of identification of relevant studies.

**Table 1.** General characteristics of the studies included in the final analysis ( $n = 15$ ; 11 articles)

| Study [Reference No.]  | Type of study                          | Country                                           | Years enrolled | Population and definition of type 1 diabetes mellitus                                                                                                                                                         | Type of cancer           | OR or RR (95% CI) | Adjusted variables                                                                                                                   |
|------------------------|----------------------------------------|---------------------------------------------------|----------------|---------------------------------------------------------------------------------------------------------------------------------------------------------------------------------------------------------------|--------------------------|-------------------|--------------------------------------------------------------------------------------------------------------------------------------|
| Hjaldgrim et al. (6)   | Retrospective cohort study             | Denmark                                           | 1973–1992      | 1659 patients with diabetes mellitus diagnosed before the age of 20 years and 1499 patients with insulin treated diabetes                                                                                     | All types                | 0.9 (0.6–1.3)     | Age, sex and age at onset of diabetes                                                                                                |
| La vecchia et al. (7)  | Case–control                           | Italy                                             | 1984–1996      | 428 Hepatocellular carcinoma patients (317 males and 111 females) and 1502 controls: subjects with diabetes below age 45 considered as having insulin-dependent diabetes                                      | Primary liver cancer     | 2.1 (1.0–4.8)     | Alcohol, tobacco consumption, history of hepatitis, liver cirrhosis, body mass index and history of cancer in first degree relatives |
| Hassan et al. (8)      | Case–control study                     | United States                                     | 1994–1995      | 115 Hepatocellular carcinoma patients and 230 non liver cancer patients: insulin-dependent diabetes by confirmation of the diagnosis and the use of insulin treatment from the medical records                | Hepatocellular carcinoma | 4.40 (1.40–13.6)  | Hepatitis virus infection, alcohol consumption and cigarette smoking                                                                 |
| Zendehdel et al. (9)   | Retrospective cohort study             | Sweden                                            | 1965–1999      | 29 187 patients aged 30 years old or younger at first hospitalization for diabetes (14 864 men and 14 323 women)                                                                                              | All types of cancer      | 1.20 (1.00–1.30)  | Age, sex and calendar year at follow-up                                                                                              |
| Swerdlow et al. (10)   | Prospective cohort                     | United Kingdom                                    | 1972–2003      | 23 834 patients with diabetes diagnosed at ages under 30 years (12 687 men and, 11 047 women)                                                                                                                 | All types of cancer      | 0.95 (0.84–1.08)  | Age, sex and duration of diabetes                                                                                                    |
| Goossens et al. (11)   | Prospective cohort                     | United Kingdom                                    | 1998–2012      | 329 168 patients with type 1 diabetes formally diagnosed or younger than 30 years and using insulin only at index date or type 2 diabetes formally diagnosed or using anti diabetic drug and 307 315 controls | Bladder cancer           | 0.77 (0.57–1.05)  | Age, sex, smoking status and body mass index                                                                                         |
| Harding et al. (4)     | Prospective cohort study               | Australia                                         | 1997–2008      | 80 676 patients with type 1 diabetes classified as type 1 on the National Diabetes Service Scheme and diagnosed before the age of 30 years (42 032 men and 38 644 women)                                      | All types of cancer      | 1.06 (1.02–1.10)  | Sex, single calendar year and 5-year age-group                                                                                       |
| Hsu et al. (3)         | Retrospective cohort study             | Taiwan                                            | 2000–2008      | 14 619 patients with type 1 diabetes with the ICD-9-CM codes 250.00 or 250.03 (6 867 men and 7 752 women)                                                                                                     | All types of cancer      | 1.13 (1.05–1.22)  | Age, sex and calendar year                                                                                                           |
| Valent et al. (12)     | Prospective cohort                     | Italy                                             | 2002–2014      | 6728 patients with diabetes whose only medication prescribed since inclusion in the registry was insulin and 1 080 260 non-diabetic subjects                                                                  | Digestive organs         | 2.68 (2.34–3.10)  | Age, sex and diabetic status                                                                                                         |
| Carstensen et al. (13) | Pooled analysis of five cohort studies | Australia, Denmark, Finland, Scotland, and Sweden | 1972–2012      | People with diabetes diagnosed below the age of 40 years in 3.9 million person-years (men in 1.975 million person-years and women in 1.958 million person-years)                                              | All types of cancer      | 1.04 (0.98–1.10)  | Sex, age and calendar time                                                                                                           |
| Hemminki et al. (14)   | Retrospective cohort study             | Sweden                                            | 1997–2010      | 32 635 patients with diabetes before the age of 30 years during the period 1964 to 1996 and insulin-dependent diabetes with the ICD code E10 (17 986 men and 14 649 women)                                    | All types of cancer      | 2.91 (1.96–4.15)  | Age, sex, period of diagnosis, socioeconomic status, and region                                                                      |

ICD-9-CM, International Classification of Disease ninth Version – Clinical Modification; OR, odds ratio; RR, relative risk; CI, confidence interval.

**Table 2. Methodological quality of studies included in the final analysis based on the Newcastle-Ottawa Scale**

| Case-control study<br>(n = 2) | Selection                                |                                     | Comparability             |                                                       | Exposure                                          |                                      | Total |
|-------------------------------|------------------------------------------|-------------------------------------|---------------------------|-------------------------------------------------------|---------------------------------------------------|--------------------------------------|-------|
|                               | Adequate definition of cases             | Representativeness of cases         | Selection of controls     | Definition of controls                                | Control for important factor or additional factor | Ascertainment of exposure (blinding) |       |
| La vecchia et al. (7)         | 1                                        | 1                                   | 1                         | 1                                                     | 1                                                 | 1                                    | 1     |
| Hassan et al. (8)             | 1                                        | 1                                   | 1                         | 1                                                     | 2                                                 | 1                                    | 1     |
| Cohort study (n = 9)          |                                          |                                     |                           |                                                       |                                                   |                                      |       |
| Cohort study (n = 9)          | Selection                                |                                     | Comparability             |                                                       | Outcome                                           |                                      | Total |
|                               | Representativeness of the exposed cohort | Selection of the non-exposed cohort | Ascertainment of exposure | Outcome of interest was not present at start of study | Control for important factor or additional factor | Assessment of outcome                |       |
| Hjalldgrim et al. (6)         | 1                                        | 0                                   | 1                         | 1                                                     | 1                                                 | 1                                    | 1     |
| Zendejdel et al. (9)          | 1                                        | 0                                   | 1                         | 1                                                     | 2                                                 | 1                                    | 0     |
| Swerdlow et al. (10)          | 1                                        | 1                                   | 1                         | 0                                                     | 2                                                 | 1                                    | 0     |
| Goossens et al. (11)          | 1                                        | 1                                   | 1                         | 1                                                     | 1                                                 | 1                                    | 1     |
| Harding et al. (4)            | 1                                        | 1                                   | 1                         | 0                                                     | 2                                                 | 1                                    | 0     |
| Hsu et al. (3)                | 1                                        | 1                                   | 1                         | 1                                                     | 2                                                 | 1                                    | 0     |
| Valent et al. (12)            | 1                                        | 0                                   | 1                         | 1                                                     | 1                                                 | 1                                    | 1     |
| Carstensen et al. (13)        | 1                                        | 1                                   | 1                         | 1                                                     | 2                                                 | 1                                    | 0     |
| Hemminki et al. (14)          | 1                                        | 1                                   | 1                         | 1                                                     | 1                                                 | 1                                    | 1     |

selection criteria. The two evaluators solved their disagreements on selection by discussion. The following data were obtained from the studies included in the final analysis: study name (year of publication and the family name of the first author), type of study design, country, years enrolled, population (gender), type of cancer, OR or RR with 95% CI, and adjusted variables.

**Assessment of methodological quality**

The methodological quality of the included studies in the final analysis was assessed based on the Newcastle-Ottawa Scale (NOS) for assessing the quality of case-control studies and cohort studies in meta-analyses (18). The score of the NOS system ranges between 0 and 9 and consists of three subscales: selection of studies, comparability and exposure. In the current study, we considered a study awarded a score of more than a mean of all studies as having high quality due to the absence of the established criteria for the high- or low-quality of a study.

**Main and subgroup analyses**

In the main analysis, we evaluated the association between type 1 diabetes and the incidence of cancer. Also, we performed subgroup meta-analyses by type of cancer, gender, region of study population (America, Europe and Asia), sample size and methodological quality of studies.

**Statistical analyses**

We used adjusted ORs or RRs and 95% CIs reported in individual articles to calculate a pooled OR or RR with 95% CI. Heterogeneity in results across studies was evaluated using Higgins I<sup>2</sup>, which measures the percentage of total differences across studies (19). We calculated I<sup>2</sup> as follows:

$$I^2 = 100\% \times (Q - df)/Q,$$

where Q represents Cochran’s heterogeneity statistic, while df is the degrees of freedom. Negative values of I<sup>2</sup> are set at zero; I<sup>2</sup> lies between 0% (heterogeneity not observed) and 100% (heterogeneity at its maximum). A value of I<sup>2</sup> greater than 50% indicated substantial heterogeneity.

We used a random-effects model meta-analysis based on the DerSimonian and Laird method because most cohort studies were conducted in the different populations (20). Also, we used Begg’s funnel plot and Egger’s test to examine publication bias regarding the studies included in the final analysis. An asymmetrical Begg’s funnel plot or a P value of less than 0.05 by Egger’s test denotes the existence of publication bias. Stata SE version 12.1 software package (StataCorp, College Station, TX, USA) was used for statistical analysis.

**Results**

**Identification of relevant studies**

Figure 1 displays a flow diagram which demonstrates how relevant studies were identified. We identified a total of 3644 articles by searching PubMed and EMBASE. A total of 382 duplicated articles and additional 3052 articles that did not meet the selection criteria were excluded in the first selection. In the final selection, we reviewed the full texts of the remaining 210 articles, and additional 195 articles were excluded because of various reasons, which are

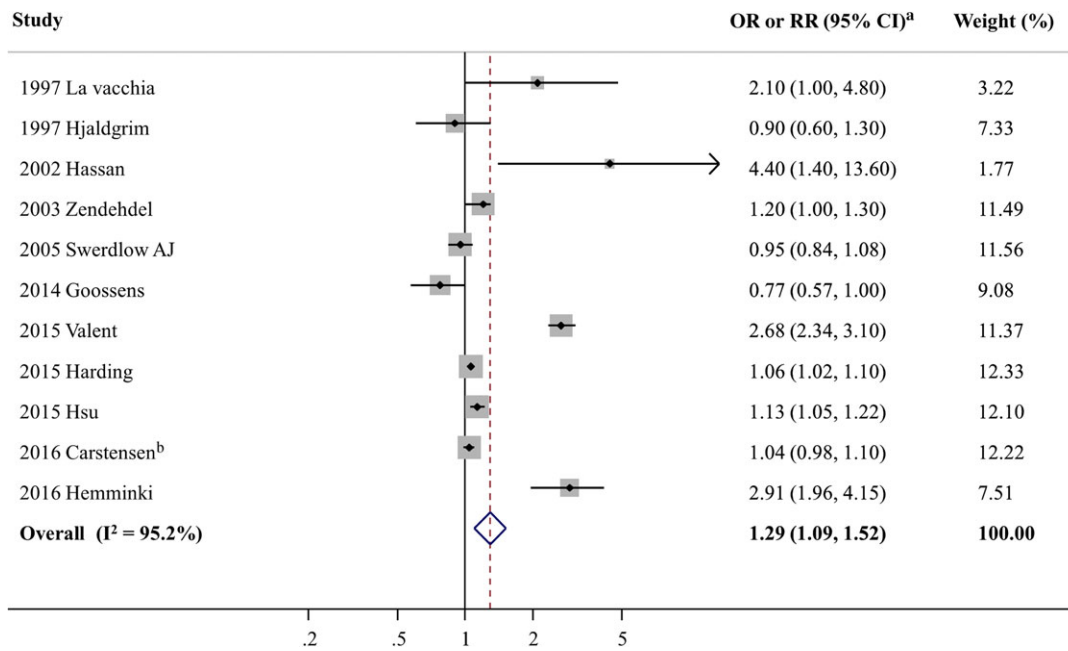

**Figure 2.** Association between type 1 diabetes mellitus and the risk of cancer in a random-effects model meta-analysis of observational studies ( $n = 15$ ; 11 articles). <sup>a</sup>Random-Effects Model. OR, odd ratio; RR, relative risk; CI, confidence interval. <sup>b</sup>A pooled study of five cohort studies.

indicated in Figure 1. A total of 11 articles (3,4,6–14) were included in the final analysis.

**General characteristics of studies**

We included a total of 15 observational studies with two case-control studies and 13 cohort studies from 11 articles, which involved 31 893 cancer patients among a total of 1 915 179 participants in the final analysis. The general characteristics of the included studies are shown in Table 1. The studies were carried out in the following countries: Sweden ( $n = 3$ ), Australia ( $n = 2$ ), UK ( $n = 2$ ), Denmark ( $n = 2$ ), Italy ( $n = 2$ ), Finland ( $n = 1$ ), Scotland ( $n = 1$ ), US ( $n = 1$ ) and Taiwan ( $n = 1$ ). The average age was 29.6 years and ranged between 17 and 59 years. The enrollment periods for participants across the studies ranged between 1965 and 2014, and the periods of follow-up in cohort studies ranged between 8 and 20 years.

**Methodological quality of studies**

The methodological quality of studies based on the NOS is shown in Table 2. The quality scores ranged between 7 and 8 with an average score of 7.4 for cohort studies and 8 for a case-control study. Four cohort studies were considered as having high quality with a score of 8.

**Main analysis on type 1 diabetes and risk of cancer**

As shown in Figure 2, a random-effects meta-analysis of all 15 studies showed a significant positive association between type 1 diabetes and the risk of cancer (OR or RR, 1.29; 95% CI, 1.09–1.52;  $I^2 = 95.2\%$ ).

**Subgroup meta-analyses**

Table 3 summarizes the results from the subgroup meta-analyses by various factors. In the subgroup meta-analysis by type of cancer, type 1 diabetes was associated with an increased risk of thyroid cancer (RR, 1.40; 95% CI, 1.19–1.66;  $I^2 = 0.00\%$ ;  $n = 6$ ), lung cancer

(RR, 1.09; 95% CI, 1.02–1.17;  $I^2 = 25.6\%$ ;  $n = 8$ ), esophagus (RR, 1.06; 95% CI, 1.02–2.42;  $I^2 = 16.7\%$ ;  $n = 6$ ), stomach cancer (RR, 1.44; 95% CI, 1.29–1.61;  $I^2 = 0.00\%$ ;  $n = 9$ ), pancreatic cancer (RR, 1.34; 95% CI, 1.18–1.52;  $I^2 = 93.3\%$ ;  $n = 9$ ), liver cancer (RR, 2.35; 95% CI, 2.12–2.61;  $I^2 = 96.6\%$ ;  $n = 9$ ), ovarian cancer (RR, 1.17; 95% CI, 1.04–1.32;  $I^2 = 69\%$ ;  $n = 7$ ), endometrial cancer (RR, 1.67; 95% CI, 1.22–2.30;  $I^2 = 40.5\%$ ;  $n = 8$ ), and kidney cancer (RR, 1.37; 95% CI, 1.23–1.52;  $I^2 = 22.9\%$ ;  $n = 8$ ).

On the contrary, type 1 diabetes reduced a risk of breast cancer (RR, 0.91; 95% CI, 0.86–0.95;  $I^2 = 0.00\%$ ;  $n = 9$ ). There was no significant association between type 1 diabetes and the risk of cancers of brain/nervous system, buccal cavity, colorectum, cervix uteri, bladder, testis, lymphoma, leukemia, multiple myeloma, bone, connective tissue and skin.

The remaining subgroup meta-analyses by region, sample size, sex and study quality also showed a positive association between type 1 diabetes and the risk of cancer.

**Assessment of publication bias**

No publication bias was found in the included studies with an asymmetrical Begg’s funnel plot and Egger’s test ( $P$  for bias = 0.218; Figure 3).

**Discussion**

This meta-analysis of observational epidemiological studies including case-control studies and cohort studies found that type 1 diabetes was significantly associated with an increased risk of cancers such as stomach cancer, lung cancer, pancreatic cancer, liver cancer, ovarian cancer and kidney cancer. Conversely, type 1 diabetes was significantly associated with a decreased risk of breast cancer.

There are some biological mechanisms that might explain a positive association between type 1 diabetes and the risk of cancer as shown in our meta-analysis. The relationship between type 1 diabetes and cancer could either be a marker of certain underlying biologic factors such as

**Table 3.** Association between type 1 diabetes mellitus and the risk of cancer in subgroup meta-analyses by various factors<sup>a</sup>

| Factors                               | No. of study <sup>b</sup> | Summary OR or RR (95% CI) | Heterogeneity, I <sup>2</sup> (%) |
|---------------------------------------|---------------------------|---------------------------|-----------------------------------|
| All [3,4,6–14]*                       | 15                        | 1.29 (1.09–1.52)          | 95.2                              |
| Type of cancer                        |                           |                           |                                   |
| Brain and/or nervous system [9,10,13] | 7                         | 0.96 (0.88–1.06)          | 0.0                               |
| Thyroid [9,13]*                       | 6                         | 1.40 (1.19–1.66)          | 0.0                               |
| Lung cancer [3,9,10,13]*              | 8                         | 1.09 (1.02–1.17)          | 25.6                              |
| Buccal cavity [9,14]                  | 2                         | 1.79 (0.96–3.36)          | 0.0                               |
| Esophagus [12,13]                     | 6                         | 1.60 (1.06–2.42)          | 16.7                              |
| Stomach cancer [3,9,10,12,13]*        | 9                         | 1.44 (1.29–1.61)          | 0.00                              |
| Colorectal cancer [9,10]              | 2                         | 0.90 (0.61–1.31)          | 20.9                              |
| Pancreatic cancer [3,9,10,12,13]      | 9                         | 1.34 (1.18–1.52)          | 94.4                              |
| Liver [3,8,9,12,14]*                  | 9                         | 2.35 (2.12–2.61)          | 96.6                              |
| Breast cancer [3,6,9,10,13]*          | 9                         | 0.91 (0.86–0.95)          | 0.0                               |
| Cervix uteri [3,9,10,13]              | 8                         | 1.24 (0.99–1.56)          | 49.4                              |
| Ovary [9,10,13]*                      | 7                         | 1.17 (1.04–1.32)          | 69                                |
| Endometrium [3,9,10,13]*              | 8                         | 1.67 (1.22–2.30)          | 40.5                              |
| Bladder [3,9,10,13]                   | 8                         | 0.98 (0.88–1.09)          | 0.0                               |
| Kidney [3,9,10,13]*                   | 8                         | 1.37 (1.23–1.52)          | 22.9                              |
| Prostate [3,10,13]                    | 7                         | 1.15 (0.30–4.41)          | 98.8                              |
| Testis [10,13]                        | 6                         | 0.88 (0.76–1.02)          | 0.0                               |
| Lymphoma [9,10,13,14]                 | 8                         | 1.02 (0.85–1.23)          | 0.0                               |
| Leukemia [9,10,13]                    | 7                         | 1.01 (0.88–1.16)          | 0.0                               |
| Multiple myeloma [13]                 | 5                         | 0.90 (0.71–1.15)          | 12.6                              |
| Bone [9]                              | 1                         | 1.00 (0.20–3.00)          | n.a.                              |
| Connective tissue [9]                 | 1                         | 1.10 (0.40–2.60)          | n.a.                              |
| Skin, melanoma [9,10,13]              | 7                         | 0.89 (0.77–1.02)          | 3.5                               |
| Skin cancer, non-melanoma [9,14]      | 2                         | 1.15 (0.60–2.20)          | 16.9                              |
| Region                                |                           |                           |                                   |
| Europe [6,7,9,10,11,12,13,14]         | 12                        | 1.17 (1.12–1.23)          | 96.4                              |
| America [8]*                          | 1                         | 4.40 (1.41–13.71)         | n.a.                              |
| Asia [3]*                             | 1                         | 1.13 (1.05–1.22)          | n.a.                              |
| Australia [4]                         | 1                         | 1.02 (0.96–1.08)          | n.a.                              |
| Sample size                           |                           |                           |                                   |
| ≥20,000 participants [4,9–14]*        | 11                        | 1.11 (1.07–1.14)          | 97.0                              |
| <20,000 participants [3,6–8]          | 4                         | 1.13 (1.05–1.22)          | 67.5                              |
| Sex                                   |                           |                           |                                   |
| Male [3,4,7,13]*                      | 8                         | 1.12 (1.09–1.15)          | 85.8                              |
| Female [3,4,7,13]*                    | 8                         | 1.14 (1.11–1.16)          | 75.6                              |
| Study quality (cohort studies)        |                           |                           |                                   |
| Low [4,6,9,10,12]                     | 5                         | 1.12 (1.08–1.16)          | 97.6                              |
| High [3,11,13,14]*                    | 8                         | 1.08 (1.03–1.13)          | 91.5                              |

<sup>a</sup>All the subgroup meta-analyses were performed based on a random-effects model.

<sup>b</sup>Carstensen et al.'s study (Reference No.9) consists of five cohort studies.

\*Statistically significant; n.a., not applicable.

OR, odds ratio; RR, relative risk; CI, confidence interval.

insulin resistance that alter the risk of cancer or be linked directly to hyperglycemia (2,21,22). Also, patients with type 1 diabetes are usually characterized by pancreatic β-cell autoimmunity with insulin deficiency that generally necessitates the lifelong provision of exogenous insulin, which is directly absorbed into systemic circulation. Supraphysiologic concentrations of insulin are required for systemic circulation, to enable sufficient levels of insulin in portal circulation to restrain hepatic gluconeogenesis (23). The iatrogenic insulin excess and possible mutagenic effects of insulin or insulin analog might be responsible for some increased cancer risks (15,16).

The increased risk of stomach cancer in patients with type 1 diabetes could be explained by several possible mechanisms. First, both the increase in body weight and the abdominal fat deposit have been blamed on the long-term use of insulin to treat diabetic patients (24). A meta-analysis of cohort studies indicated that overall, excess

body weight was associated with an increased risk of stomach cancer (25). Also, the increased risk of stomach cancer among patients with type 1 diabetes might be linked to a high prevalence of helicobacter pylori infection in those patients or a high incidence of pernicious anemia that is closely related to a high risk of stomach cancer because parietal cell antibodies are more frequent in patients with type 1 diabetes, compared to the general population (26,27).

It was already reported that diabetes was significantly associated with an increased risk of lung cancer, especially in women from the meta-analysis of 34 observational studies although it did not differentiate type 1 diabetes from type 2 diabetes (28). Potential mechanisms includes increased levels of insulin-like growth factor-1 (IGF-1) due to excess insulin, which play an important role in lung carcinogenesis (17) and hyperglycemia leading to the damage to the lung structure such as emphysema, which is an independent risk factor for lung cancer (29,30).



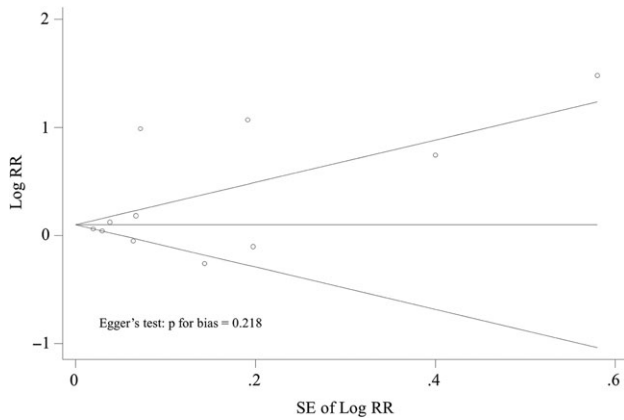

**Figure 3.** Begg's funnel plots and Egger's test for identifying publication bias in the meta-analysis of observational studies. OR, odd ratio; RR, relative risk; SE, standard error.

Although the causal mechanisms for the increased risk of liver cancer in type 1 diabetes remain unclear, possible biological mechanisms are a result of alteration in hepatocellular activity, possibly mitosis related to metabolic changes in patients with diabetes (31) and steatohepatitis related to obesity and fibrotic progression to cirrhosis resulting in liver cancer (32).

It has been proposed that hyperinsulinemia and raised androgen levels found in menstruating women with type 1 diabetes are associated with an increased risk of ovarian cancer (10). However, the exact mechanisms remain unclear because the levels of insulin and androgen are also raised in women with type 2 diabetes. Also, excess insulin could directly stimulate the growth of endometrial cells and increase the levels of estrogen resulting in proliferation of endometrial cells, both of which consequently could increase the risk of endometrial cancer (33). Like other cancers, increased insulin resistance, excess insulin and obesity might be possible mechanisms for the increased risk of kidney cancer in patients with type 1 diabetes (34).

The interesting finding in our study is that type 1 diabetes was associated with a decreased risk of breast cancer by 9%. This is contrary to the findings that the risk of breast cancer in women with type 2 diabetes was increased by 20–27% from the previous meta-analyses (35,36). Among the eight studies on breast cancer, only a pooled analysis of five studies (13) indicated a significant decreased risk of breast cancer in patients with type 1 diabetes, whereas three studies (3,9,10) reported no significant association. Although Carstensen et al. of the pooled study (13) mentioned that their contradictory finding might be confounded by other breast cancer risk factors such as parity, the plausible mechanisms or reasons for their findings remain unclear. Further prospective studies with proper adjustment for possible confounding factors are warranted to confirm this finding.

Recent meta-analyses reported mainly the association between type 2 diabetes or overall diabetes and the risk of individual cancers (28,37–39). To the best of our knowledge, this study is considered to be the first meta-analysis of observational epidemiological studies that investigated the association between type 1 diabetes and the risk of cancer. We found a modest increase, 29% in the risk of overall cancers in patients with type 1 diabetes compared to those without type 1 diabetes. However, those risks were much higher in several types of cancer, i.e. by 40% for thyroid cancer, 44% for stomach cancer, 34% for pancreatic cancer, 135% for liver cancer,

67% for endometrial cancer and 37% for kidney cancer (Table 3). Also, we found that type 1 diabetes was associated with a slightly reduced risk of breast cancer by 9%.

Our study has limitations. First, there is a possibility of misclassification of type 2 diabetes into type 1 diabetes, which might lead to an overestimation of the association between type 1 diabetes and the risk of cancer. Also, the criteria for the definition of type 1 diabetes varied across the included studies. Hassan et al.'s study just mentioned insulin-dependent DM or non-insulin-dependent DM in the results section without mentioning how they defined them (8), while Valent et al. defined it as insulin treated diabetes (12). Also, Hsu et al.'s study used the International Classification of Disease ninth version, Clinical Modification (ICD-9-CM) codes for defining type 1 diabetes (3). The remaining studies defined patients with type 1 diabetes as those who were 30 years old or younger, or diabetes diagnosed before the age of 30 or 45 years (4,6,7,9–11,14). When we performed a subgroup meta-analysis excluding three studies (1997 Hjaldrgrim; 2002 Hassan; 2015 Valent), which used only insulin treatment as the criteria for type 1 diabetes (data not shown in figure or table), the increased risk of cancer became smaller than that of the previous analysis (RR, 1.10; 95% CI, 1.00–1.21). Last, there might exist confounders on the association between type 1 diabetes and the risk of cancer because most of the included studies did not adjust important risk factors such as tobacco consumption, alcohol intake, obesity, physical activity, family history of cancer and socioeconomic status for the development of cancer.

## Conclusions

We found that type 1 diabetes was associated with an increased risk of overall cancers by using a meta-analysis of observational studies and a decreased risk of breast cancer. However, further studies are warranted to confirm our findings because of the possibility of misclassification and the existence of potential confounders on the association them.

## Type of study design

Systematic Review and Meta-Analysis

## Group name

The Korean Meta-Analysis (KORMA) Study Group

## Funding

None.

## Conflict of interest statement

We declare no competing interests.

## Contributors

Mukete F. Sona: conception, design, evaluation of the eligibility of studies, acquisition of data, statistical analysis and manuscript writing. Seung-Kwon Myung: conception, design, statistical analysis, manuscript writing, critical review, interpretation of data, editing and final approval of the version to be published. Keeho Park:

critical review and interpretation of data. Galsuren Jargalsaikhan: evaluation of the eligibility of studies and acquisition of data.

## References

- Vigneri P, Francesco F, Laura S, Giusepp P, Richado V. Diabetes and cancer. *Endocr Relat Cancer* 2009;16:1103–23.
- Giovannucci E, Harlan DM, Acher MC, et al. Diabetes and cancer: a consensus report. *CA Cancer J Clin* 2010;60:207–21.
- Hsu PC, Lin WH, Kuo TH, Lee HM, Kuo C, Li CY. A population-based cohort study of all-cause and site-specific cancer incidence among patients with type 1 diabetes mellitus in Taiwan. *J Epidemiol* 2015;25:567–73.
- Harding JL, Jonathan ES, Anna P, Bendix C, Dianna JM. Cancer risk among people with type 1 and type 2 diabetes: disentangling true associations, detection bias, and reverse causation. *Diabetes Care* 2015;38:264–70.
- Tabák AG, Jokela M, Akbaraly TN, Brunner EJ, Kivimäki M, Witte DR. Trajectories of glycaemia, insulin sensitivity, and insulin secretion before diagnosis of type 2 diabetes: an analysis from the Whitehall II study. *Lancet* 2009;373:2215–21.
- Hjalgrim H, Frisch M, Ekblom A, Kyvik KO, Melbye M, Green A. Cancer and diabetes – a follow-up study of two population-based cohorts of diabetic patients. *J Intern Med* 1997;241:471–5.
- La Vecchia C, Negri E, Decarli A, Franceschi S. Diabetes mellitus and the risk of primary liver cancer. *Int J Cancer* 1997;73:204–7.
- Hassan MM, Hwang LY, Hatten CJ, et al. Risk factors for hepatocellular carcinoma: synergism of alcohol with viral hepatitis and diabetes mellitus. *Hepatology* 2002;36:1206–13.
- Zendehdel K, Olof N, Claes-Goran O, Hans Olov A, Anders E, Weimin Y. Cancer incidence in patients with type 1 diabetes mellitus: a population-based cohort study in Sweden. *J Natl Cancer Inst* 2003;95:1797–1800.
- Swerdlow AJ, Laing SP, Qiao Z, et al. Cancer incidence and mortality in patients with insulin-treated diabetes: a UK cohort study. *Br J Cancer* 2005;92:2070–5.
- Goossens ME, Zeegers MP, Bazelier MT, De Bruin ML, Buntix F, de Vries F. Risk of bladder cancer in patients with diabetes: a retrospective cohort study. *BMJ Open* 2015;5:e007470.
- Valent F. Diabetes mellitus and cancer of the digestive organs: an Italian population-based cohort study. *J Diabetes Complications* 2015;29:1056–61.
- Carstensen B, Read SH, Friis S, et al. Cancer incidence in persons with type 1 diabetes: a five-country study of 9,000 cancers in type 1 diabetic individuals. *Diabetologia* 2016;59:980–8.
- Hemminki K, Forsti A, Sundquist K, Li X. Cancer of unknown primary is associated with diabetes. *Eur J Cancer Prev* 2016;25:246–51.
- Kurtzhals P, Schaffer L, Sorenson A, et al. Correlations of receptor binding and metabolic and mitogenic potencies of insulin analogs designed for clinical use. *Diabetes* 2000;49:999–1005.
- Laron Z. Insulin-like growth factor 1 (IGF-1): a growth hormone. *Mol Pathol* 2001;54:311–6.
- Kim WY, Jin Q, Oh SH, et al. Elevated epithelial insulin-like growth factor expression is a risk factor for lung cancer development. *Cancer Res* 2009;69:7439–48.
- Wells GA, Shea B, O'Connell D, et al. *The Newcastle-Ottawa Scale (NOS) for Assessing the Quality of Nonrandomised Studies in Meta-analyses (Internet)*. Ottawa: The Ottawa Hospital, Research Institute, 2016;(cited 2016 Feb 2). Available from: [http://www.ohri.ca/programs/clinical\\_epidemiology/oxford.htm](http://www.ohri.ca/programs/clinical_epidemiology/oxford.htm).
- Higgins JP, Thompson SG. Quantifying heterogeneity in a meta-analysis. *Stat Med* 2002;21:1539–58.
- Borenstein M, Hedges LV, Higgins JP, Rothstein HR. A basic introduction to fixed-effect and random-effects models for meta-analysis. *Res Synth Methods* 2010;1:97–111.
- Gordon-Dseagu VL, Shelton N, Mindell JS. Epidemiological evidence of a relationship between type-1 diabetes mellitus and cancer: a review of the existing literature. *Int J Cancer* 2013;132:501–8.
- Schmiedel S, Geoffrey MJ, Maria B, Joachim S. Spatial clustering of leukemia and type 1 diabetes in children in Denmark. *Cancer Causes Control* 2011;22:849–57.
- Chen YJ, Chang YT, Wang CB, Wu CY. Malignancy in systemic lupus erythematosus: a nationwide cohort study in Taiwan. *Am J Med* 2010;123:1150.e1–6.
- Domargård A, Sarnblad S, Kroon M, Karlsson I, Skeppner G, Aman J. Increased prevalence of overweight in adolescent girls with type 1 diabetes mellitus. *Acta Paediatr* 1999;88:1223–8.
- Yang P, Zhou Y, Chen B, et al. Overweight, obesity and gastric cancer risk: results from a meta-analysis of cohort studies. *Eur J Cancer* 2009;45:2867–73.
- De Block CE, De Leeuw IH, Van Gaal LF. High prevalence of manifestations of gastric autoimmunity in parietal cell antibody-positive Type 1 (Insulin-Dependent) Diabetic Patients 1. *J Clin Endocrinol Metab* 1999;84:4062–7.
- Kolho KL, Jusufovic J, Miettinen A, Savilahti E, Rautelin H. Parietal cell antibodies and Helicobacter pylori in children. *J Pediatr Gastroenterol Nutr* 2000;30:265–8.
- Lee JY, Jeon I, Lee JM, Yoon JM, Park SM. Diabetes mellitus as an independent risk factor for lung cancer: a meta-analysis of observational studies. *Eur J Cancer* 2013;49:2411–23.
- Forgiarini LA Jr, Kretzmann NA, Porawski M, Dias AS, Marroni NA. Experimental diabetes mellitus: oxidative stress and changes in lung structure. *J Bras Pneumol* 2009;35:788–91.
- Lee G, Walser TC, Dubinett SM. Chronic inflammation, chronic obstructive pulmonary disease, and lung cancer. *Curr Opin Pulm Med* 2009;15:303–7.
- La Vecchia C, Negri E, Franceschi S, D'Avanzo B, Boyle P. A case-control study of diabetes mellitus and cancer risk. *Br J Cancer* 1994;70:950–3.
- Wideroff L, Gridley G, Møller-Nielsen L, et al. Cancer incidence in a population-based cohort of patients hospitalized with diabetes mellitus in Denmark. *J Natl Cancer Inst* 1997;89:1360–5.
- Friberg E, Mantzoros CS, Wolk A. Diabetes and risk of endometrial cancer: a population-based prospective cohort study. *Cancer Epidemiol, Biomarkers Prev* 2007;16:276–80.
- Larsson SC, Wolk A. Diabetes mellitus and incidence of kidney cancer: a meta-analysis of cohort studies. *Diabetologia* 2011;54:1013–8.
- Larsson SC, Mantzoros CS, Wolk A. Diabetes mellitus and risk of breast cancer: a meta-analysis. *Int J Cancer* 2007;121:856–62.
- Boyle P, Boniol M, Koechlin A, et al. Diabetes and breast cancer risk: a meta-analysis. *Br J Cancer* 2012;107:1608–17.
- Gu J, Yan S, Wang B, et al. Type 2 diabetes mellitus and risk of gallbladder cancer: a systematic review and meta-analysis of observational studies. *Diabetes Metab Res Rev* 2016;32:63–72.
- Guraya SY. Association of type 2 diabetes mellitus and the risk of colorectal cancer: a meta-analysis and systematic review. *World J Gastroenterol* 2015;21:6026–31.
- Gong Y, Wei B, Yu L, Pan W. Type 2 diabetes mellitus and risk of oral cancer and precancerous lesions: a meta-analysis of observational studies. *Oral Oncol* 2015;51:332–40.
